# Supplementary material
Source: Springer Nature journal article supplement (https://www.springermedizin.de/resource/supplementary/12955_2006_338_MOESM1_ESM.pdf/9560318)
Supplement: MOESM1 [file 9560318]

### A. Discriminative Validity of the ASQOL based on BASDAI Scores

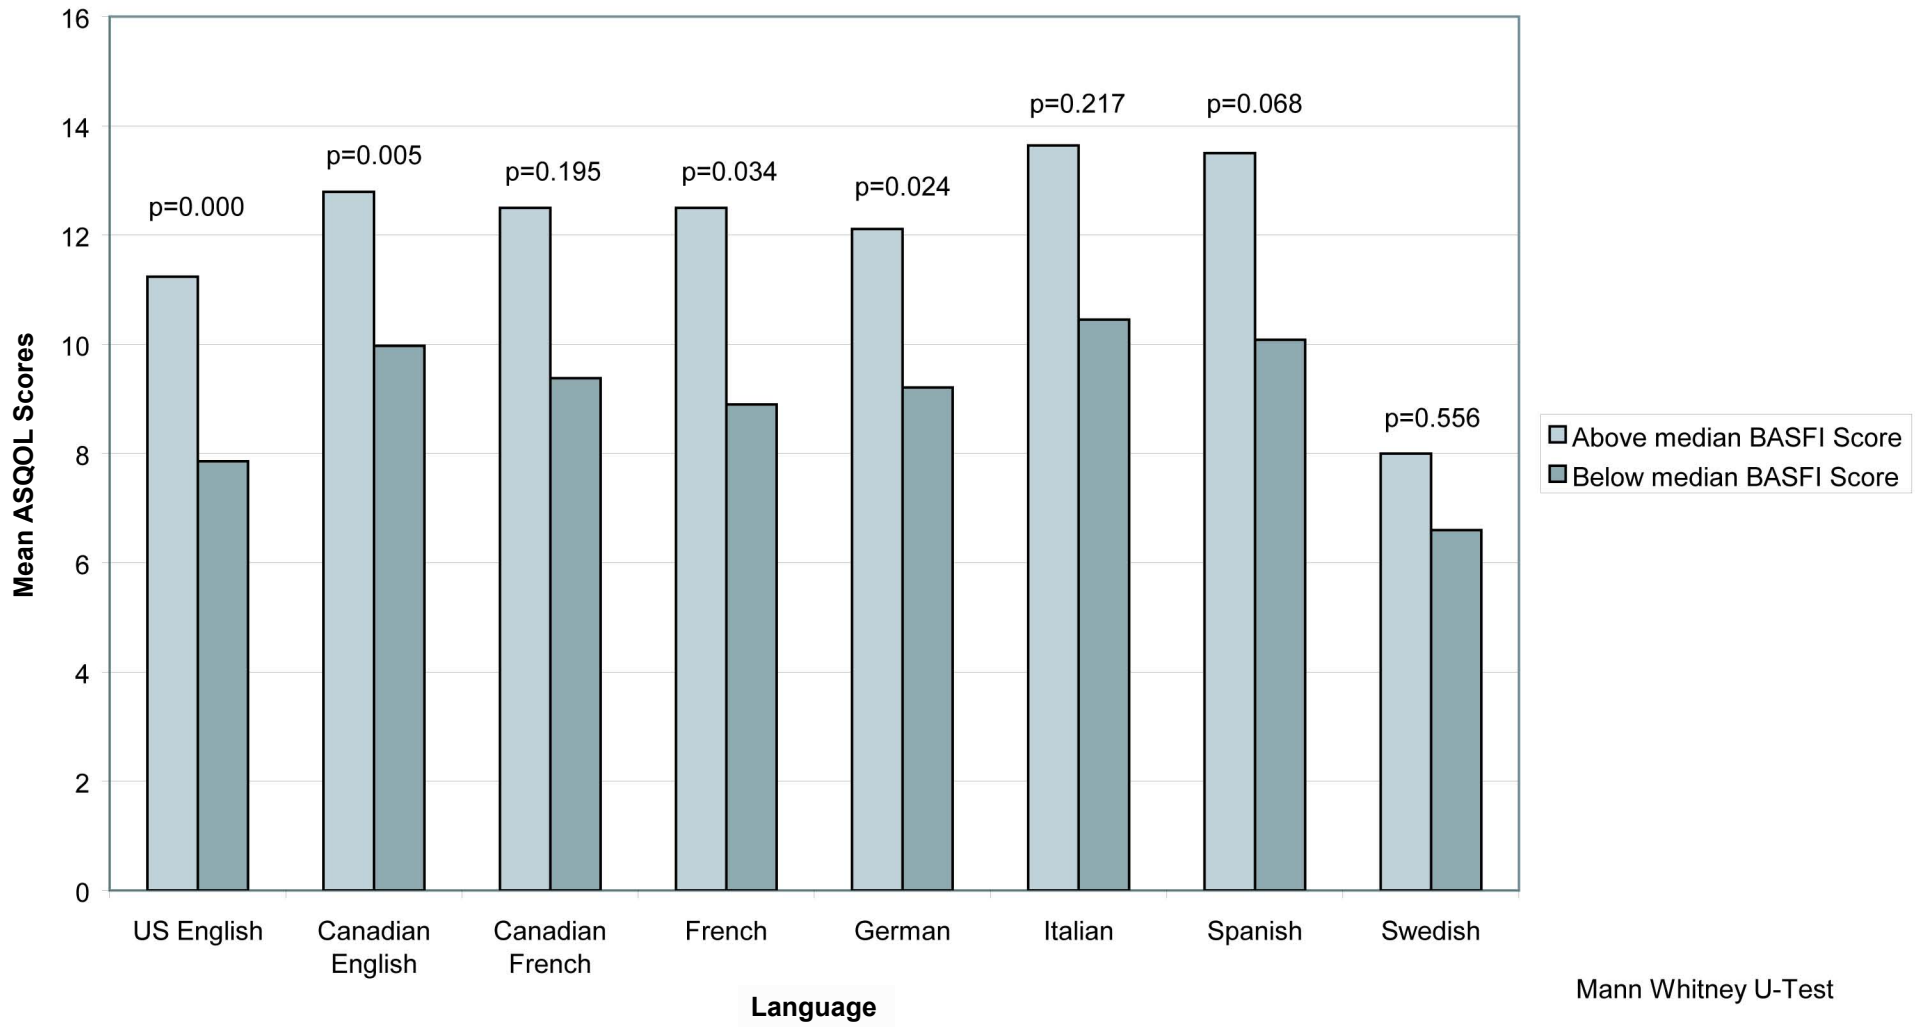

### B. Discriminative Validity Based on Self-Rated Health\*

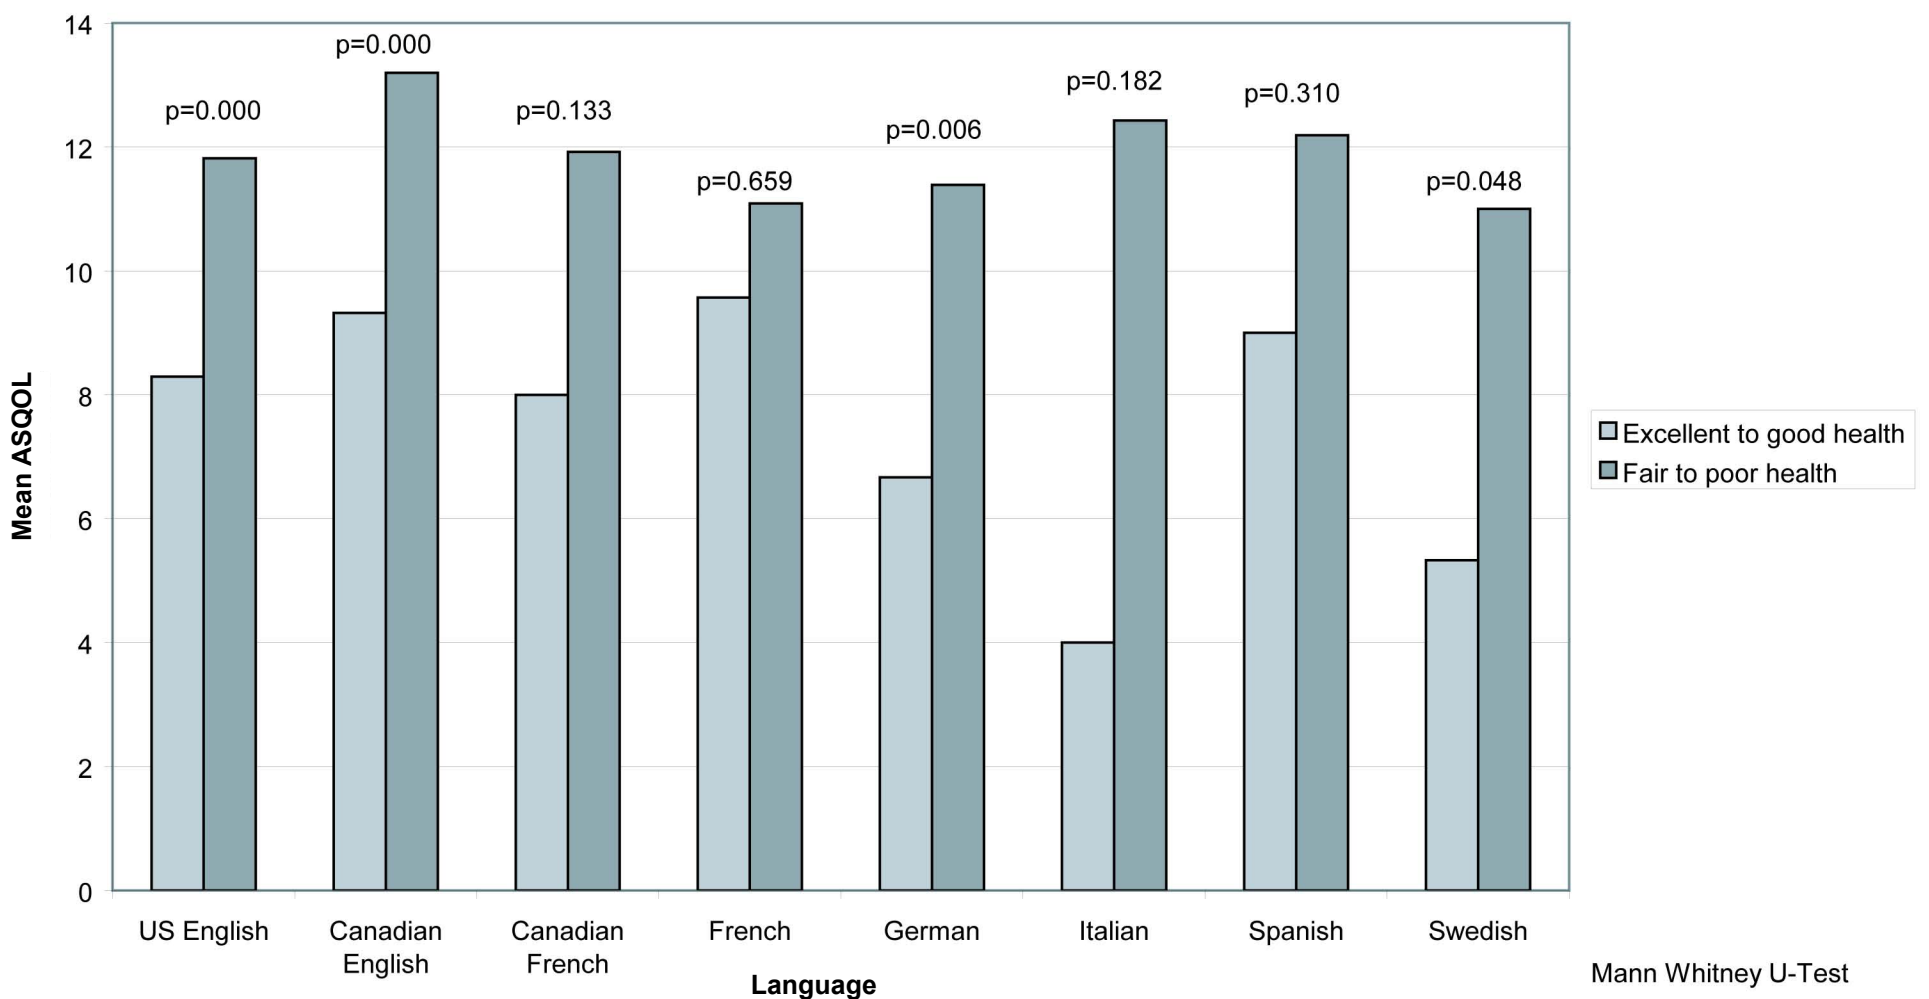

\*SF-36 Question 1: Excellent to good health; Fair to poor health
